# Supplementary material for: United States County-level COVID-19 Death Rates and Case Fatality Rates Vary by Region and Urban Status
Source: Healthcare (Basel). 2020 Sep 9;8(3):330. doi: 10.3390/healthcare8030330 (PMC7551952; doi:10.3390/healthcare8030330)
Supplement: Supplementary file 1 [file healthcare-08-00330-s001.pdf]

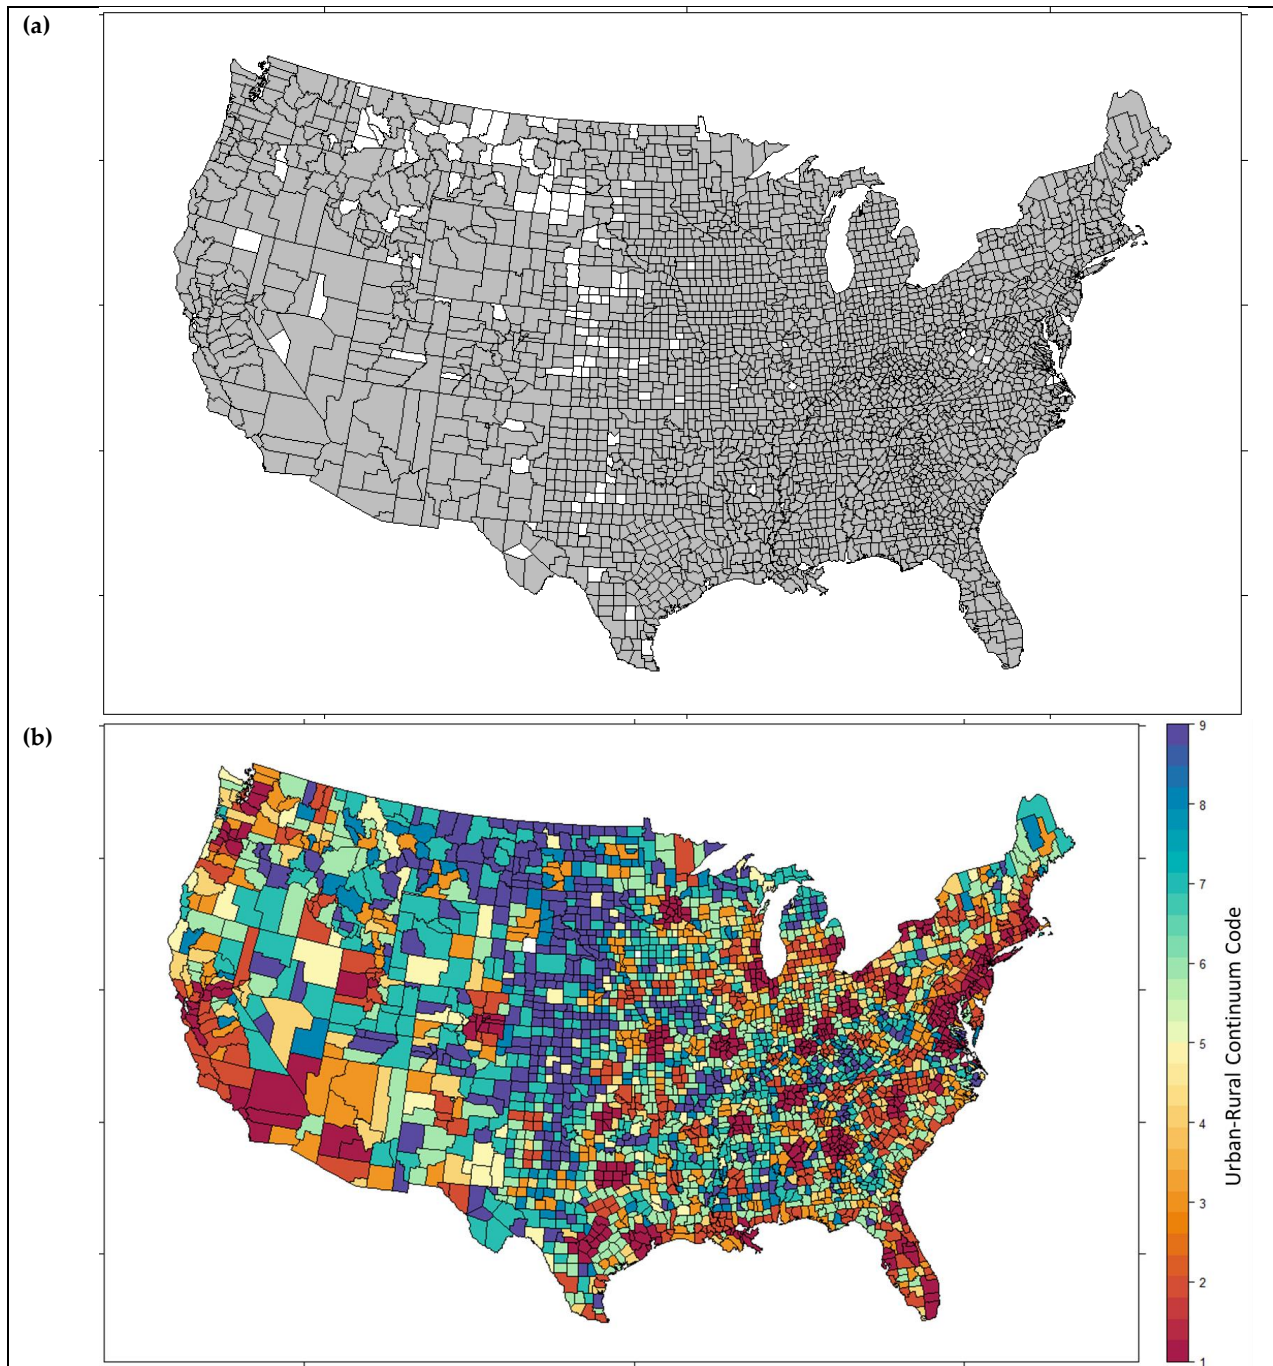

**Figure S1.** County-level maps. **(a)** COVID-19 case status. Counties in grey had at least one confirmed case by 23 June 2020. Counties in white had not confirmed cases and were not used in the analysis. **(b)** Urban-rural status. Counties were colored based on their 2013 rural-urban continuum code (United States Department of Agriculture Economic Research Service).

**Table S1.** Null and full model significance and fit statistics. Significance values and fit statistics for both null (variable(s) of interest only) and full models (variable(s) of interest and confounding factors).

|                    | Null Model |         |                        |            | Full Model |         |                        |            |
|--------------------|------------|---------|------------------------|------------|------------|---------|------------------------|------------|
|                    | F-Value    | p-Value | Pearson Chi-Squared/DF | AICc Score | F-Value    | p-Value | Pearson Chi-Squared/DF | AICc Score |
| Deaths per 100,000 |            |         |                        |            |            |         |                        |            |
| <b>Rural-Urban</b> | 19.72      | <0.001  | 1.19                   | 19886.36   | 10.56      | <0.001  | 1.20                   | 19532.88   |
| <b>Region</b>      | 50.93      | <0.001  | 0.98                   | 19818.26   | 19.37      | <0.001  | 1.21                   | 19530.05   |
| <b>Interaction</b> | -          | -       | -                      | -          | 4.45       | <0.001  | 1.29                   | 19408.39   |
| Deaths per cases   |            |         |                        |            |            |         |                        |            |
| <b>Rural-Urban</b> | 12.61      | <0.001  | 1.31                   | -7677.06   | 7.32       | <0.001  | 1.30                   | -7692.80   |
| <b>Region</b>      | 19.20      | <0.001  | 1.47                   | -7559.42   | 17.35      | <0.001  | 1.32                   | -7714.03   |
| <b>Interaction</b> | -          | -       | -                      | -          | 3.14       | <0.001  | 1.25                   | -7780.82   |

**Table S2.** Population mortality rate estimates for interaction model. Model-corrected mean mortality rate per 100,000 for the interaction between US region and Rural-Urban Continuum Code. Confidence Intervals are 95%.

| Rural-Urban Code | US Region | Mean     | Lower CI                | Upper CI               |
|------------------|-----------|----------|-------------------------|------------------------|
| 1                | Midwest   | 27.0286  | 19.003                  | 38.4437                |
| 2                | Midwest   | 15.8208  | 10.6489                 | 23.5045                |
| 3                | Midwest   | 19.8212  | 14.1444                 | 27.7765                |
| 4                | Midwest   | 21.052   | 13.9772                 | 31.7077                |
| 5                | Midwest   | 13.5222  | 7.4193                  | 24.6452                |
| 6                | Midwest   | 18.1381  | 14.0858                 | 23.3561                |
| 7                | Midwest   | 10.7542  | 8.1033                  | 14.2721                |
| 8                | Midwest   | 13.5124  | 8.874                   | 20.5751                |
| 9                | Midwest   | 2.5257   | 1.8572                  | 3.4349                 |
| 1                | Northeast | 54.1714  | 33.9185                 | 86.5175                |
| 2                | Northeast | 44.4105  | 26.3462                 | 74.8606                |
| 3                | Northeast | 27.7557  | 14.4771                 | 53.2136                |
| 4                | Northeast | 17.7833  | 9.3515                  | 33.8177                |
| 5                | Northeast | 3.939    | 0.3149                  | 49.2679                |
| 6                | Northeast | 16.0482  | 8.6996                  | 29.6042                |
| 7                | Northeast | 2.862    | 1.2247                  | 6.688                  |
| 8                | Northeast | 2.9336   | 0.6537                  | 13.1659                |
| 9                | Northeast | 0.000015 | $1.08 \times 10^{-153}$ | $2.22 \times 10^{143}$ |
| 1                | Southeast | 12.3538  | 9.2226                  | 16.5481                |
| 2                | Southeast | 8.8594   | 6.7271                  | 11.6676                |
| 3                | Southeast | 12.6128  | 9.3781                  | 16.9633                |
| 4                | Southeast | 8.4136   | 5.3947                  | 13.1221                |
| 5                | Southeast | 11.9758  | 5.6148                  | 25.5431                |
| 6                | Southeast | 13.45    | 10.4369                 | 17.3331                |
| 7                | Southeast | 12.4522  | 8.8415                  | 17.5375                |
| 8                | Southeast | 8.0411   | 5.4204                  | 11.9289                |
| 9                | Southeast | 9.9245   | 6.5864                  | 14.9542                |
| 1                | Southwest | 4.9543   | 2.8597                  | 8.583                  |
| 2                | Southwest | 8.2249   | 4.6702                  | 14.4853                |
| 3                | Southwest | 11.9765  | 6.3992                  | 22.4147                |
| 4                | Southwest | 14.2088  | 6.7676                  | 29.8317                |
| 5                | Southwest | 15.5039  | 6.0647                  | 39.6348                |
| 6                | Southwest | 8.6809   | 5.8062                  | 12.9787                |
| 7                | Southwest | 7.2489   | 4.4667                  | 11.7641                |
| 8                | Southwest | 4.6357   | 2.01                    | 10.6912                |
| 9                | Southwest | 4.4569   | 2.4267                  | 8.1854                 |
| 1                | West      | 10.0353  | 5.4573                  | 18.4535                |
| 2                | West      | 7.688    | 4.4391                  | 13.3146                |
| 3                | West      | 7.0635   | 4.0683                  | 12.2638                |
| 4                | West      | 3.3839   | 1.6676                  | 6.8669                 |
| 5                | West      | 4.6738   | 2.1044                  | 10.3803                |
| 6                | West      | 7.8265   | 4.388                   | 13.9594                |
| 7                | West      | 11.6106  | 7.7199                  | 17.4621                |
| 8                | West      | 1.8717   | 0.6598                  | 5.31                   |
| 9                | West      | 1.7126   | 0.9482                  | 3.093                  |

**Table S3.** Case fatality rate estimates for interaction model. Model-corrected mean case fatality rate percentage (CFR%) for the interaction between US region and Rural-Urban Continuum Code. Confidence Intervals are 95%.

| Rural-Urban Code | US Region | CFR % | Lower CI | Upper CI |
|------------------|-----------|-------|----------|----------|
| 1                | Midwest   | 5.7   | 5.0      | 6.5      |
| 2                | Midwest   | 4.8   | 4.1      | 5.7      |
| 3                | Midwest   | 4.5   | 3.8      | 5.2      |
| 4                | Midwest   | 4.3   | 3.6      | 5.1      |
| 5                | Midwest   | 4.6   | 3.5      | 6.1      |
| 6                | Midwest   | 5.9   | 5.3      | 6.7      |
| 7                | Midwest   | 5.5   | 4.7      | 6.5      |
| 8                | Midwest   | 9.8   | 8.1      | 11.8     |
| 9                | Midwest   | 8.0   | 6.3      | 10.2     |
| 1                | Northeast | 7.4   | 6.3      | 8.5      |
| 2                | Northeast | 6.4   | 5.4      | 7.7      |
| 3                | Northeast | 5.6   | 4.4      | 7.1      |
| 4                | Northeast | 4.0   | 3.1      | 5.2      |
| 5                | Northeast | 3.0   | 1.0      | 8.1      |
| 6                | Northeast | 4.6   | 3.5      | 6.0      |
| 7                | Northeast | 4.5   | 3.0      | 6.8      |
| 8                | Northeast | 4.7   | 2.0      | 10.7     |
| 9                | Northeast | 9.4   | 4.9      | 17.2     |
| 1                | Southeast | 4.3   | 3.8      | 4.8      |
| 2                | Southeast | 3.8   | 3.4      | 4.3      |
| 3                | Southeast | 4.2   | 3.7      | 4.8      |
| 4                | Southeast | 3.4   | 2.8      | 4.1      |
| 5                | Southeast | 4.7   | 3.4      | 6.3      |
| 6                | Southeast | 4.2   | 3.8      | 4.7      |
| 7                | Southeast | 4.2   | 3.6      | 4.9      |
| 8                | Southeast | 4.3   | 3.6      | 5.3      |
| 9                | Southeast | 5.2   | 4.2      | 6.4      |
| 1                | Southwest | 4.7   | 3.6      | 6.0      |
| 2                | Southwest | 5.7   | 4.5      | 7.3      |
| 3                | Southwest | 5.0   | 3.7      | 6.7      |
| 4                | Southwest | 5.2   | 3.8      | 7.1      |
| 5                | Southwest | 6.2   | 4.3      | 8.9      |
| 6                | Southwest | 6.0   | 5.0      | 7.3      |
| 7                | Southwest | 7.2   | 5.5      | 9.4      |
| 8                | Southwest | 9.3   | 6.0      | 14.0     |
| 9                | Southwest | 22.8  | 17.3     | 29.4     |
| 1                | West      | 5.4   | 4.2      | 7.0      |
| 2                | West      | 4.7   | 3.6      | 6.0      |
| 3                | West      | 4.9   | 3.8      | 6.2      |
| 4                | West      | 3.7   | 2.4      | 5.7      |
| 5                | West      | 4.3   | 2.5      | 7.1      |
| 6                | West      | 5.1   | 3.6      | 7.2      |
| 7                | West      | 6.0   | 4.7      | 7.7      |
| 8                | West      | 3.9   | 1.4      | 10.1     |
| 9                | West      | 7.0   | 3.8      | 12.4     |
